# Supplementary material for: Diastereoselective synthesis of chiral 1,3-cyclohexadienals
Source: PLoS One. 2018 Feb 13;13(2):e0192113. doi: 10.1371/journal.pone.0192113 (PMC5810990; doi:10.1371/journal.pone.0192113)
Supplement: S4 File — (DOCX) [file pone.0192113.s004.docx]

**Diastereoselective Synthesis of Chiral 1,3-Cyclohexadienals**

Aitor Urosa1¶, Ignacio E. Tobal1¶, Angela P. de la Granja1, M. Carmen Capitán1, R. F. Moro1, Isidro S. Marcos1, Narciso M. Garrido1, Francisca Sanz2, Emilio Calle3 and David Díez1*

1 Departamento de Química Orgánica, Facultad de Ciencias Químicas, Universidad de Salamanca, Salamanca. Spain.

2 Servicio de Difracción de Rayos X, Universidad de Salamanca, Salamanca, Spain.

3 Departamento de Química Física, Facultad de Ciencias Químicas, Universidad de Salamanca, Salamanca. Spain.

*E-mail: [ddm@usal.es](mailto:ddm@usal.es)

¶ These authors contributed equally to this work.

**SUPPORTING INFORMATION 4**

**UV-Vis spectra**

**UV-VIS ABSORBANCE DATA**

**UV-Vis Spectra of 4a**

**
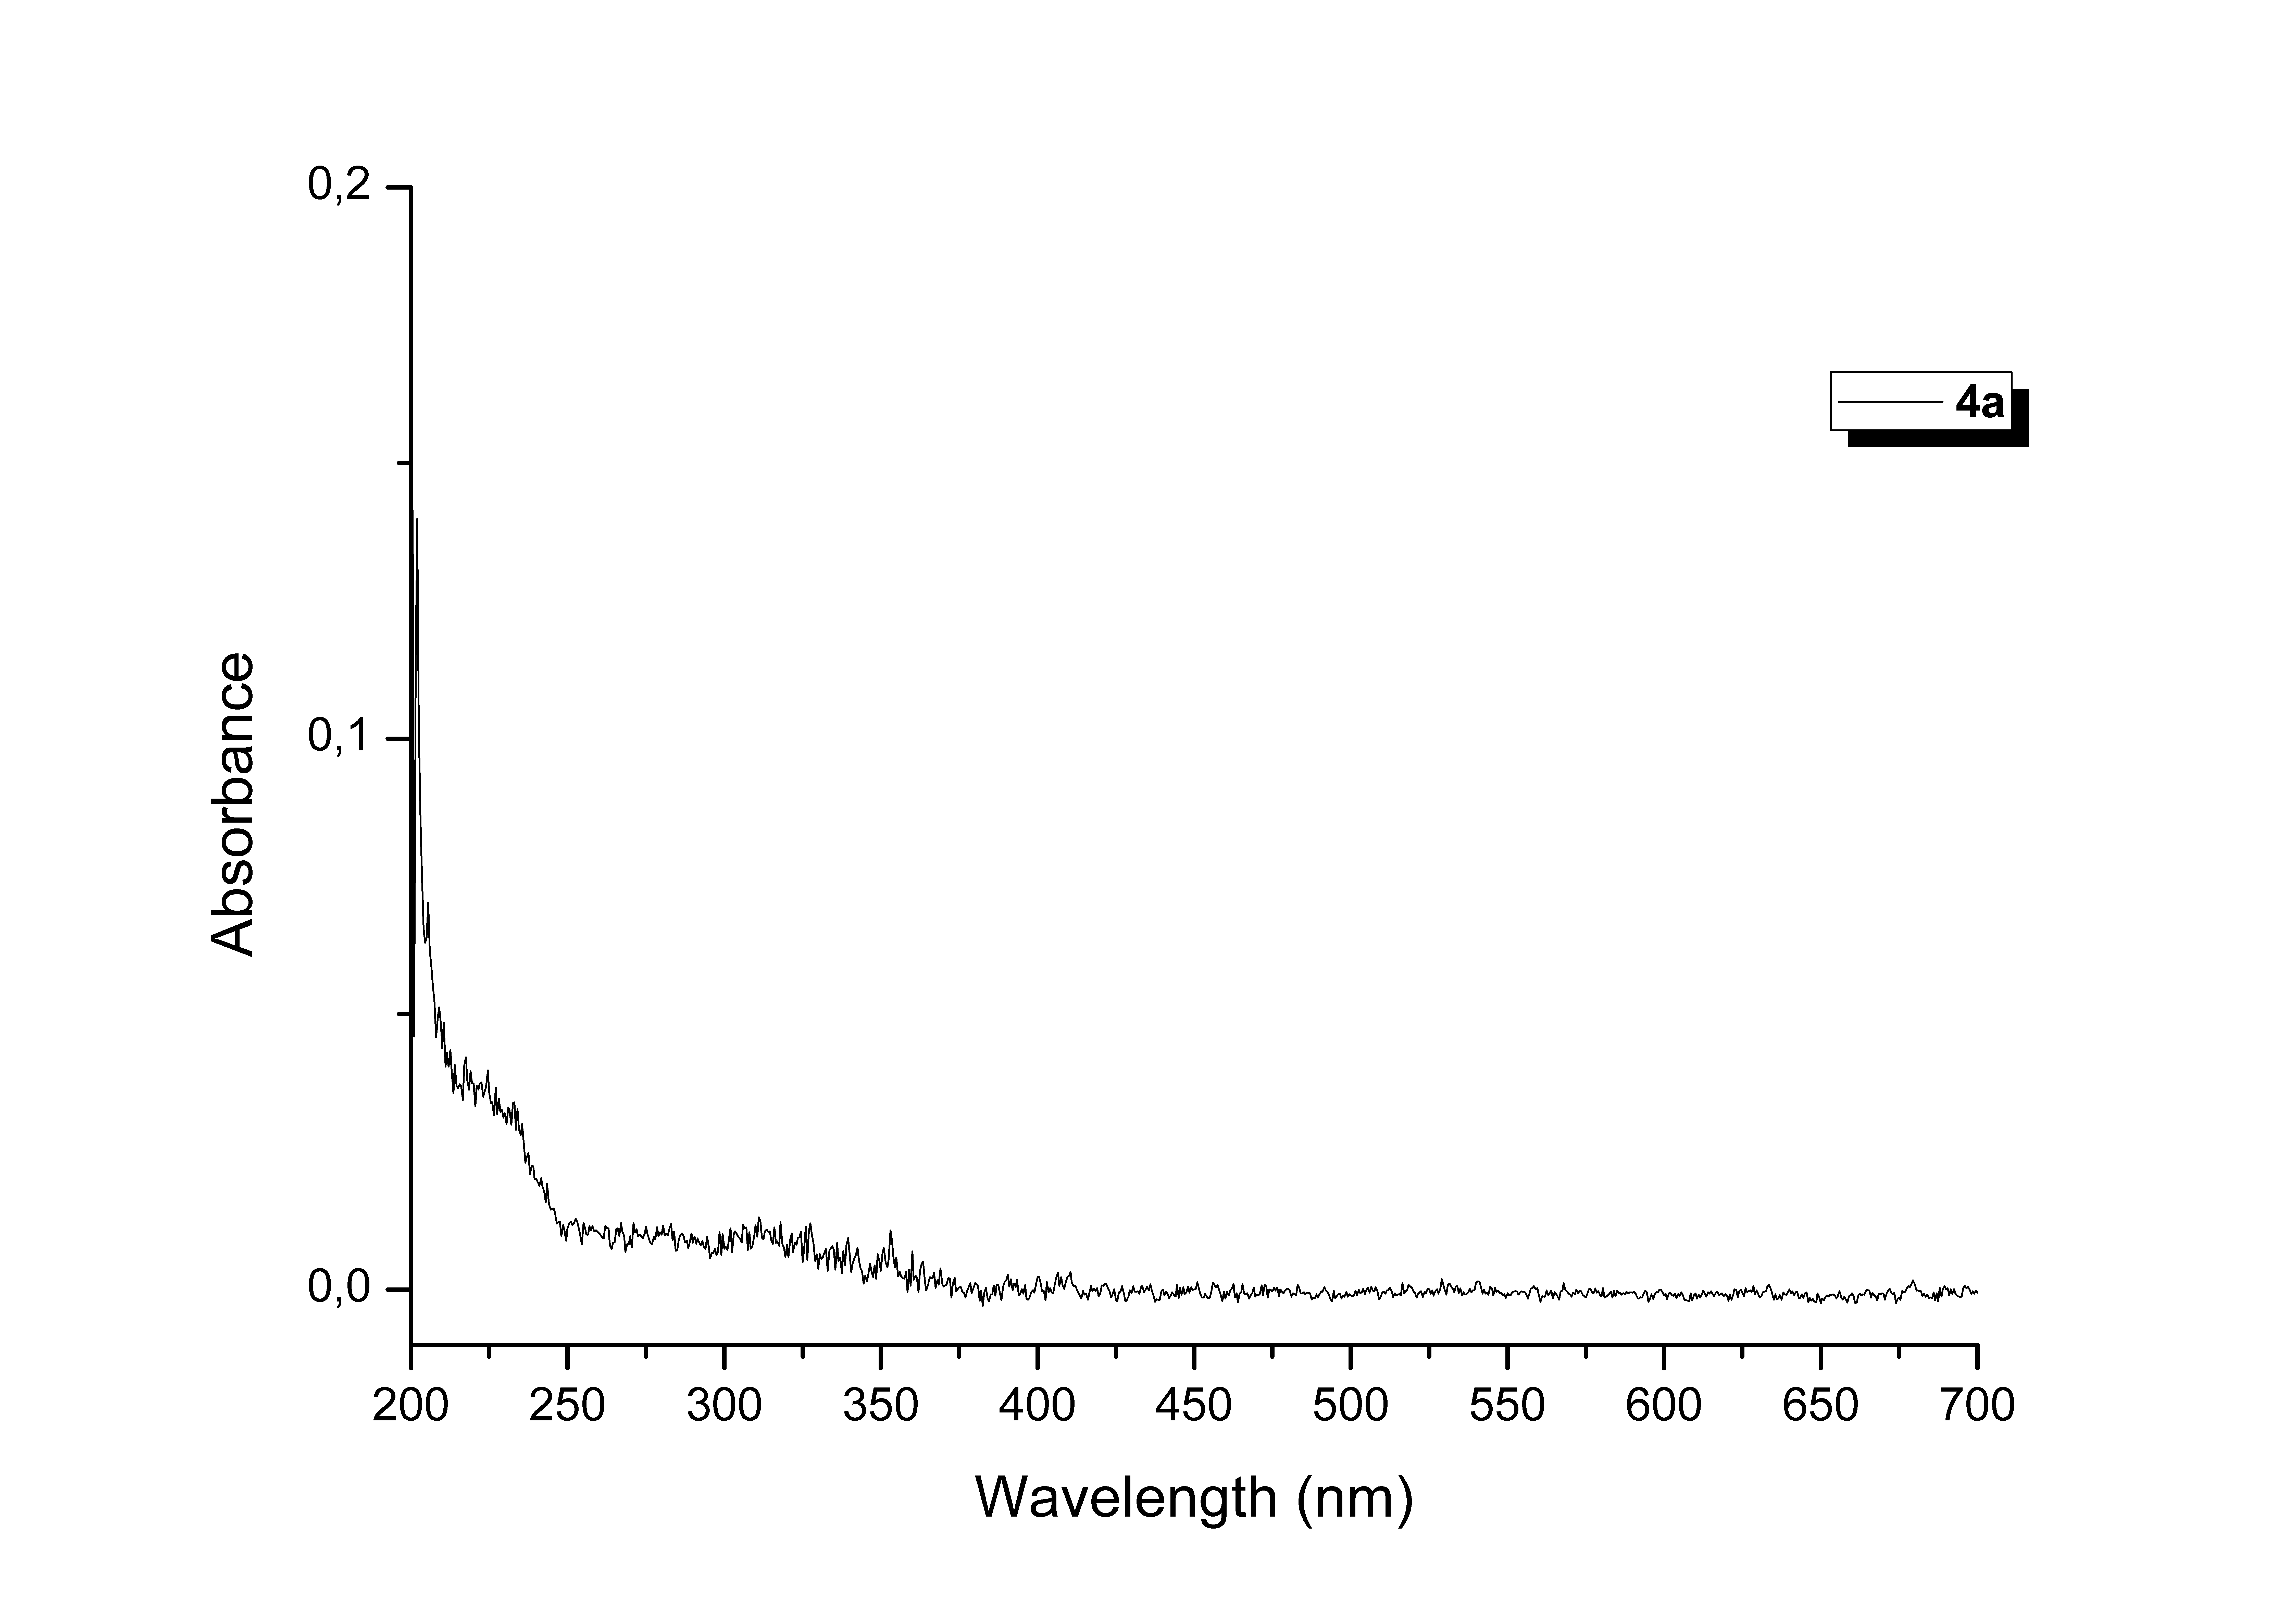
**

**UV-Vis Spectra of 20b**

**
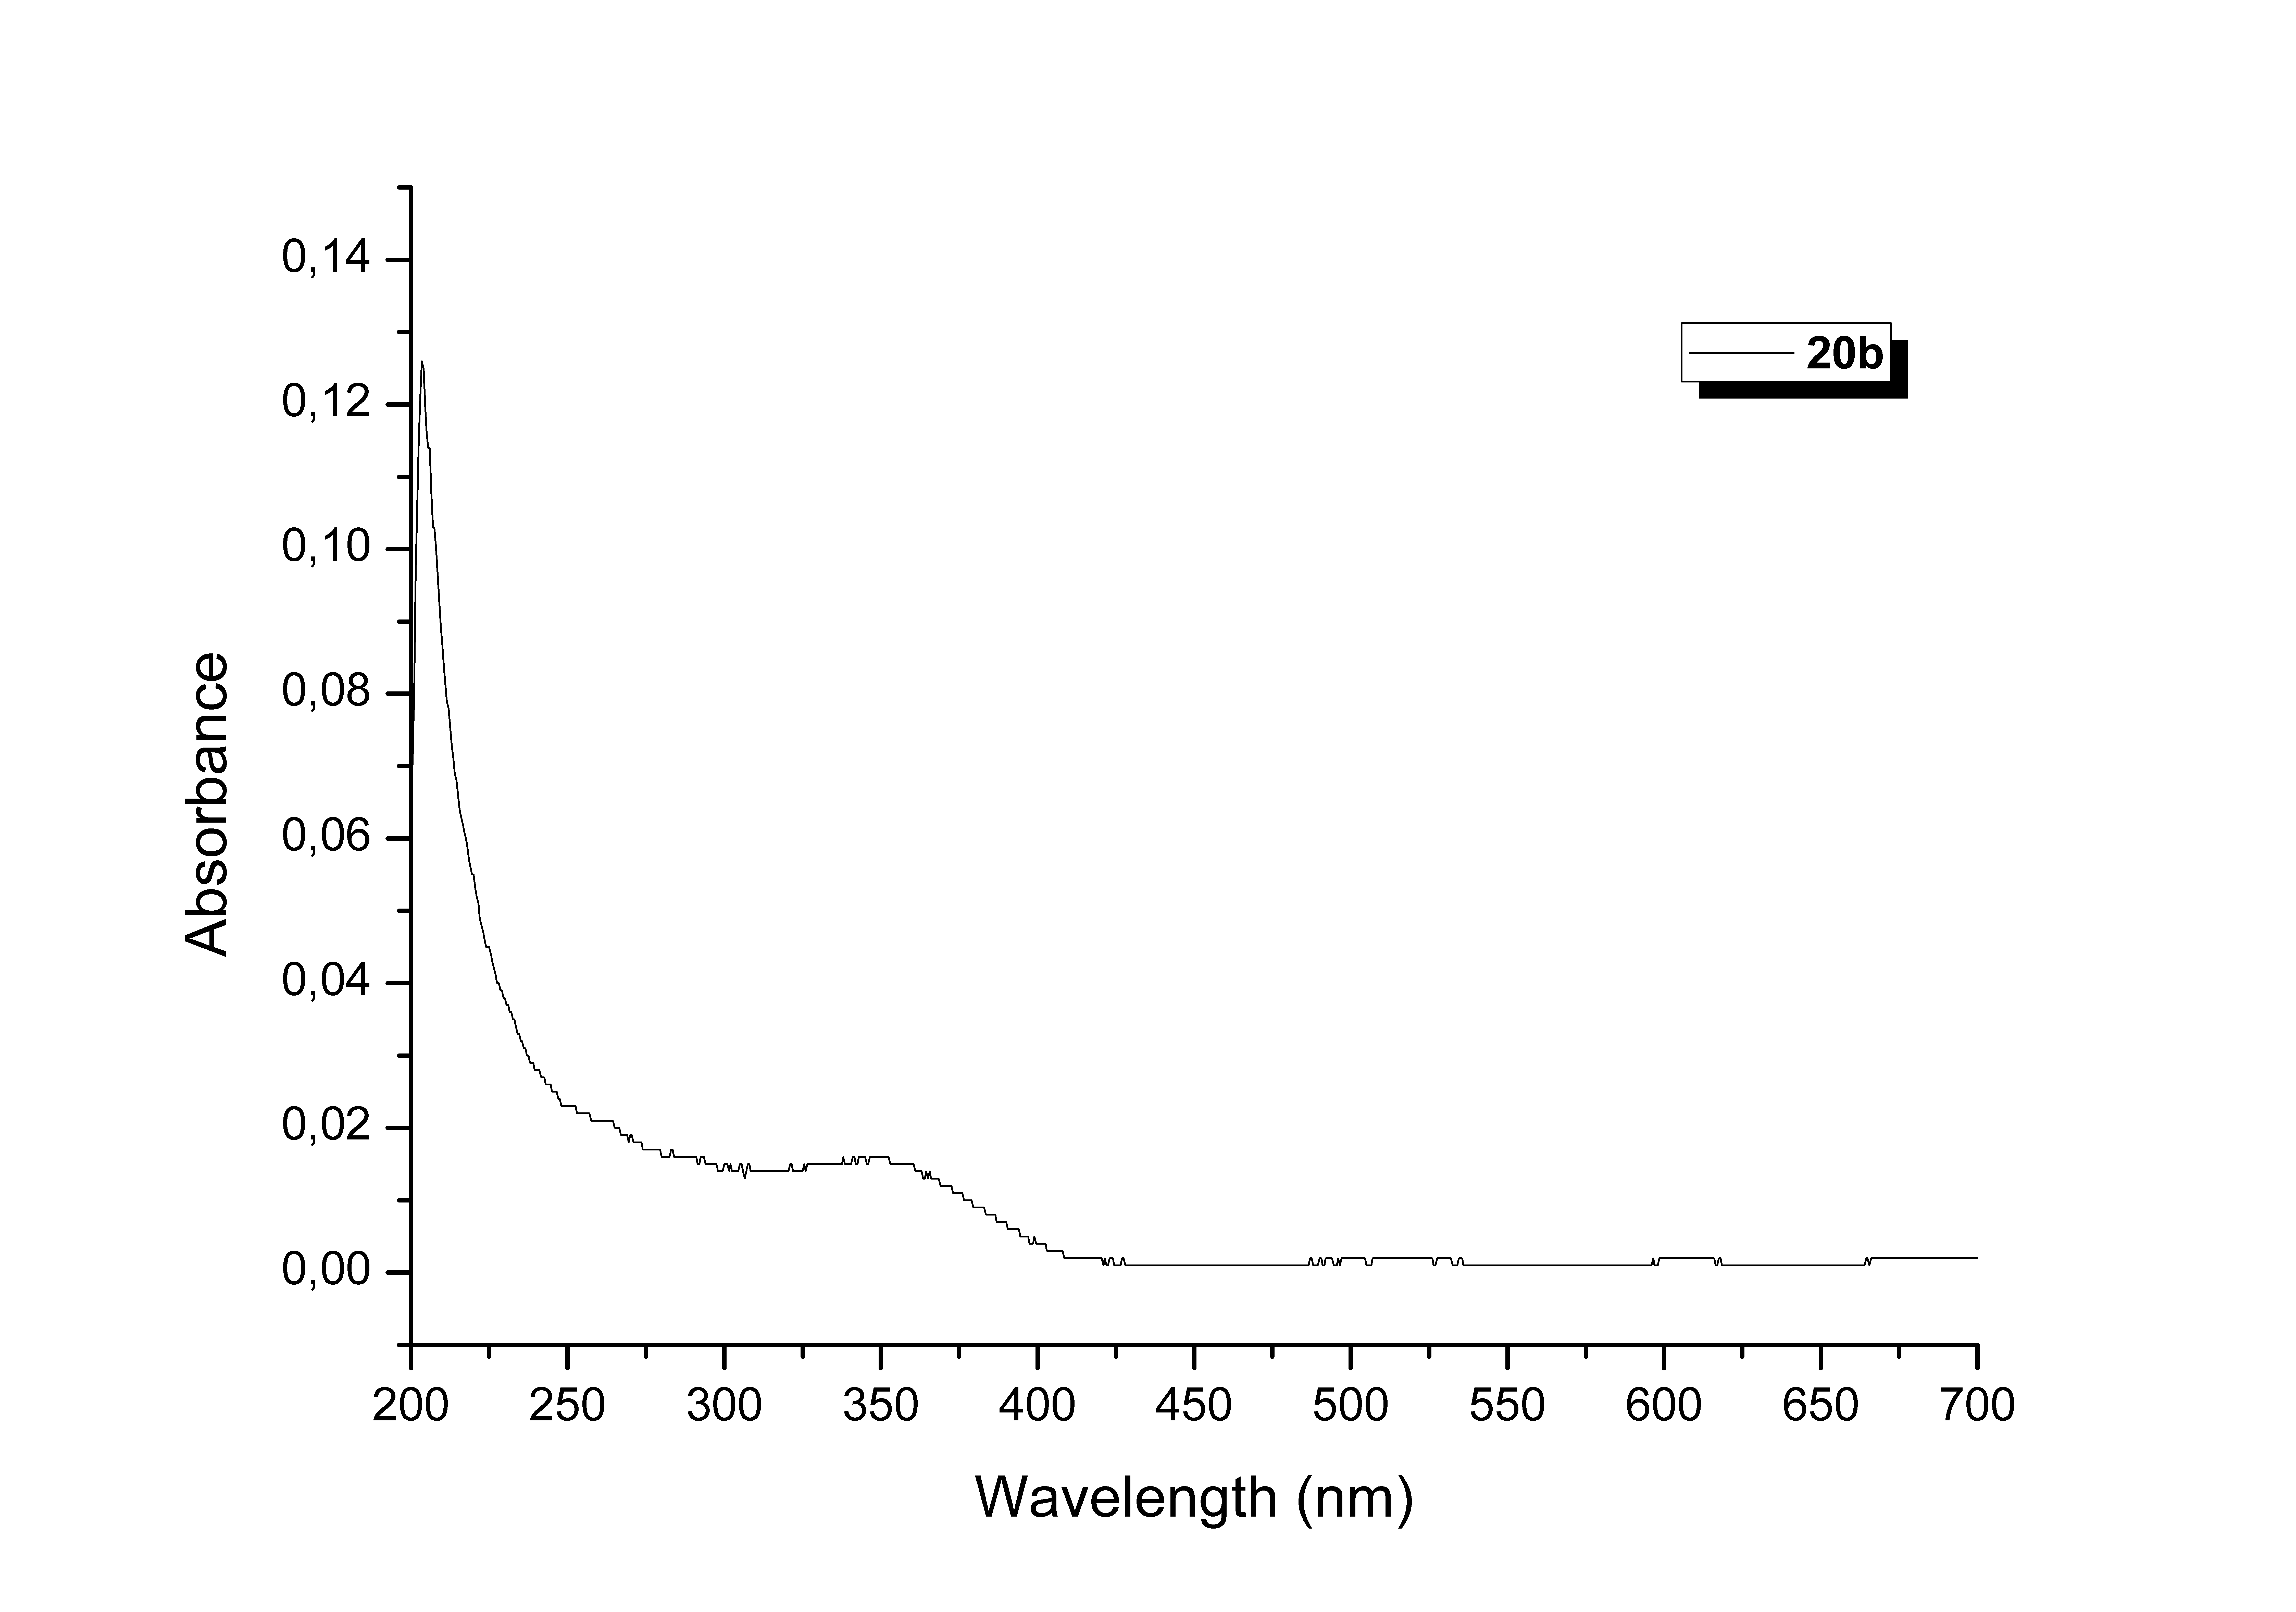
**

**UV-Vis Spectra of 21b**

**
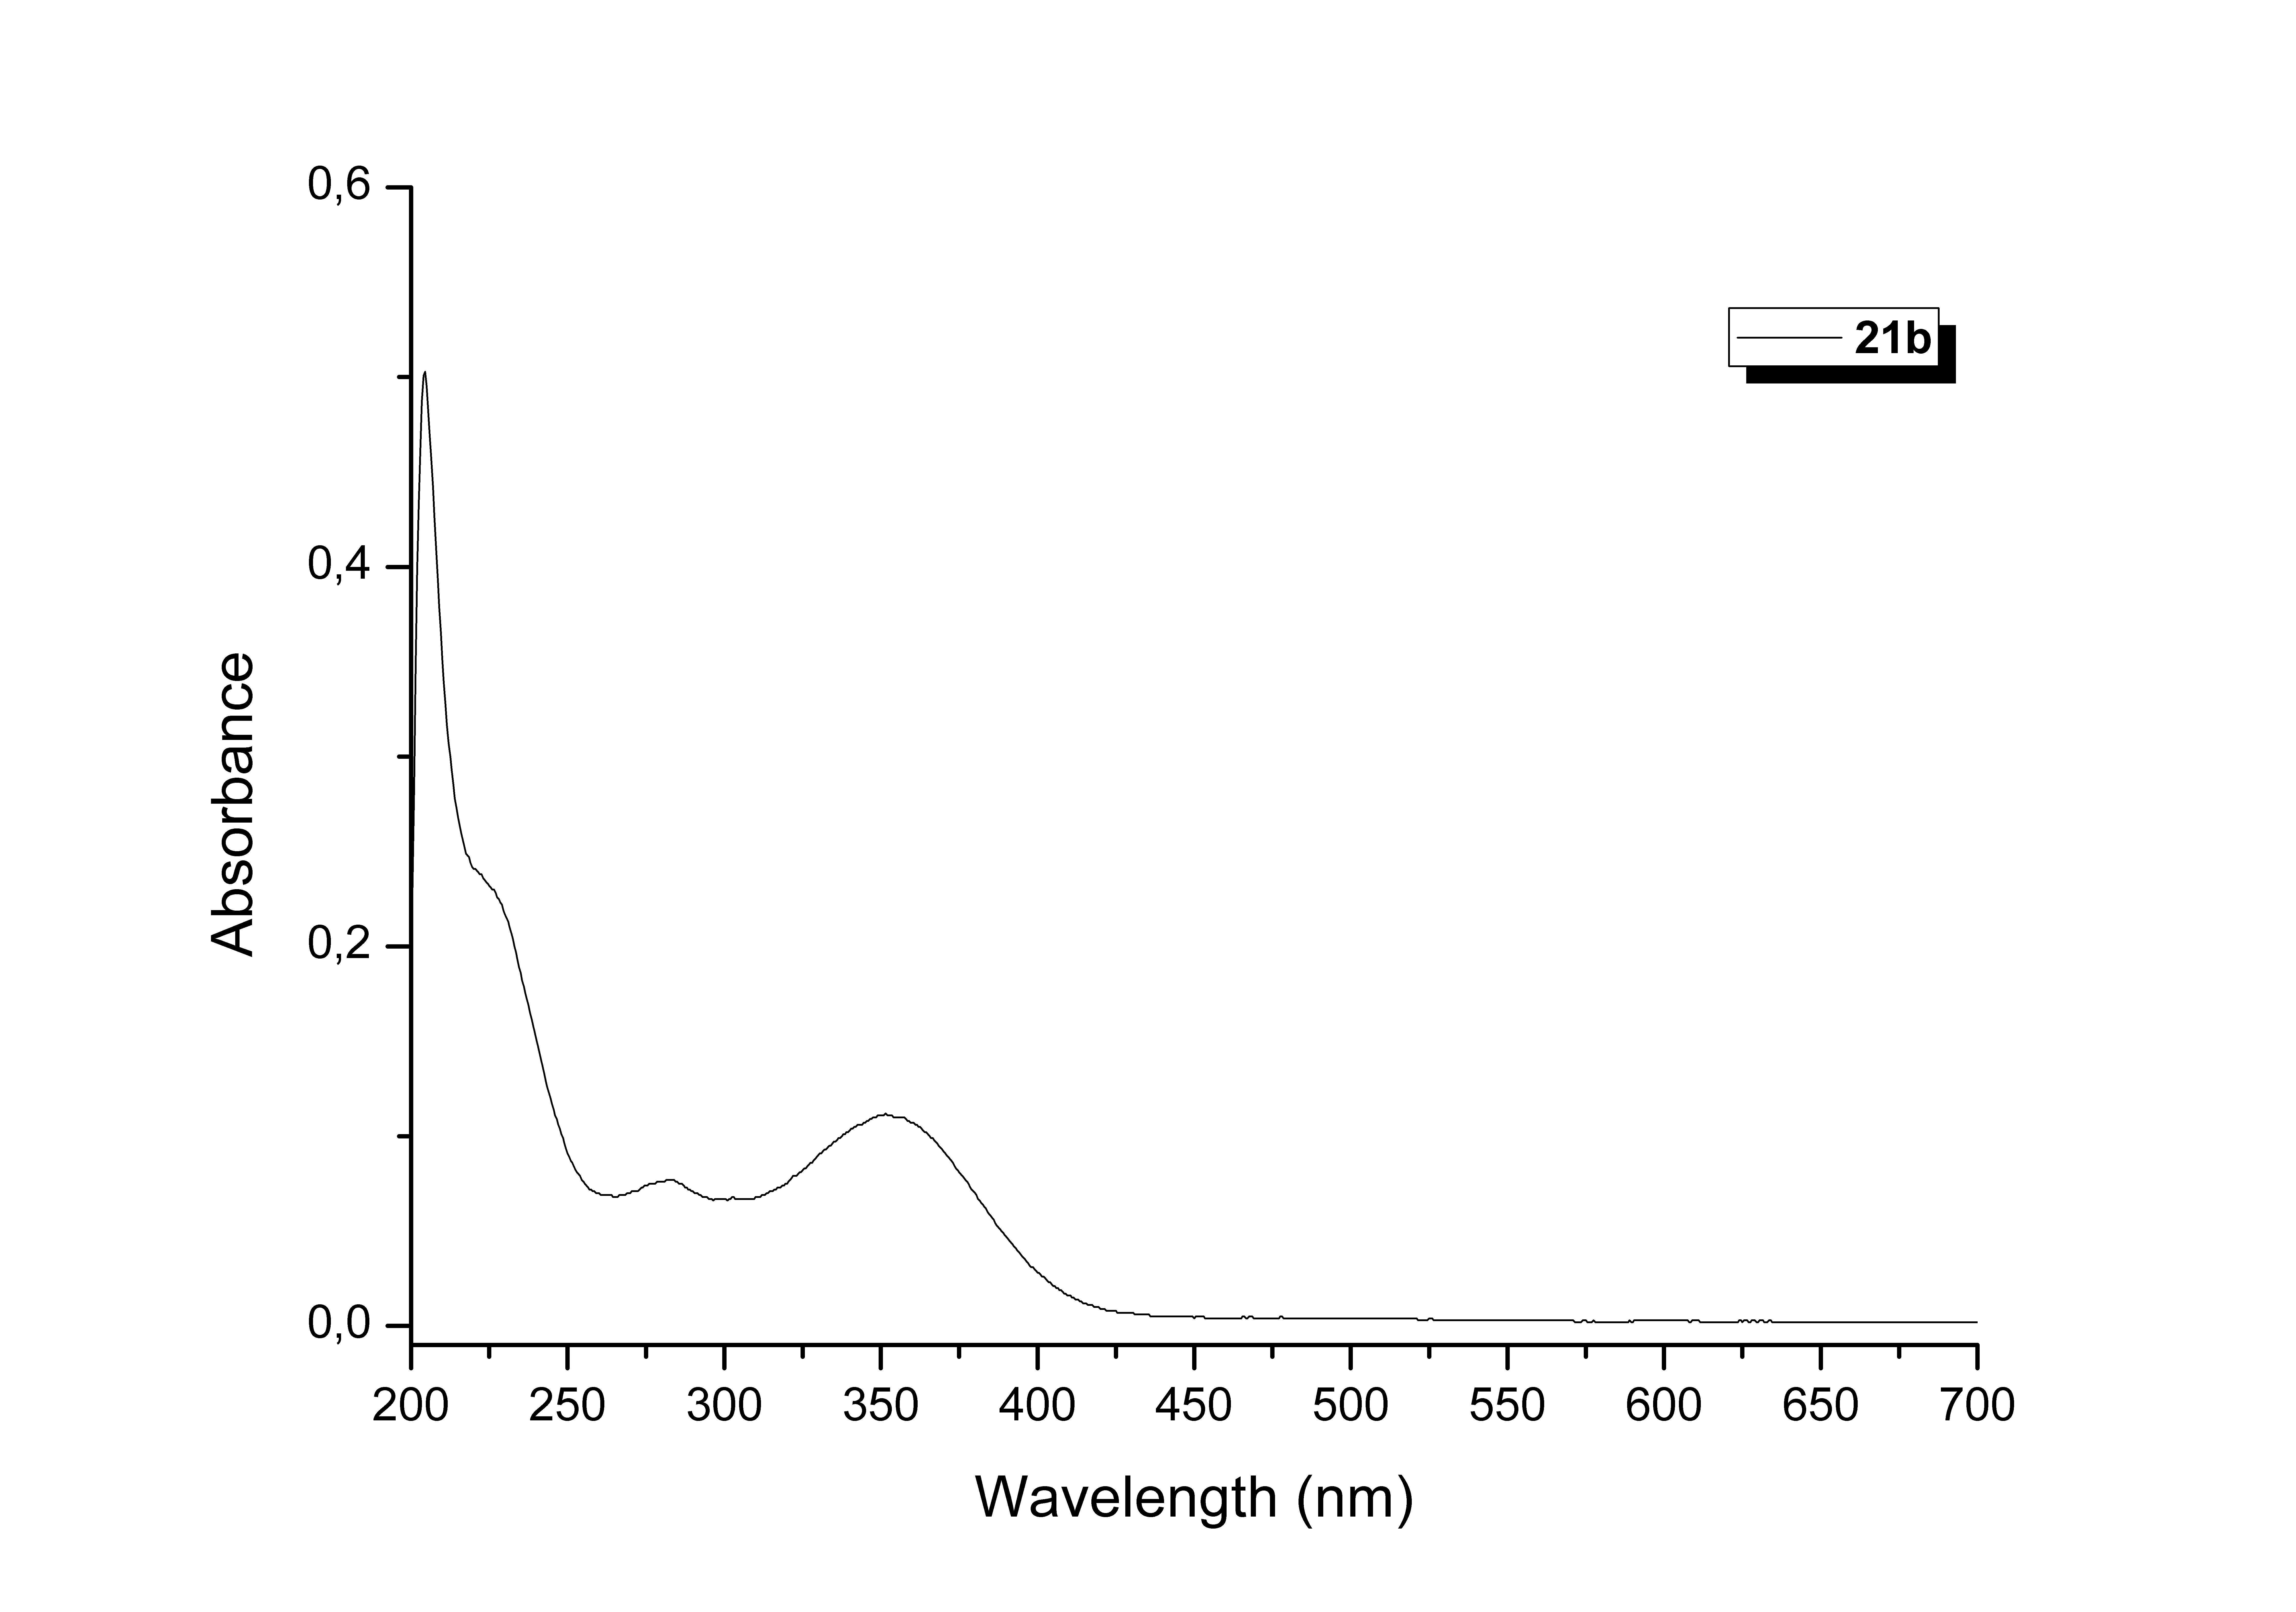
**

**UV-Vis Spectra of 22b**

**
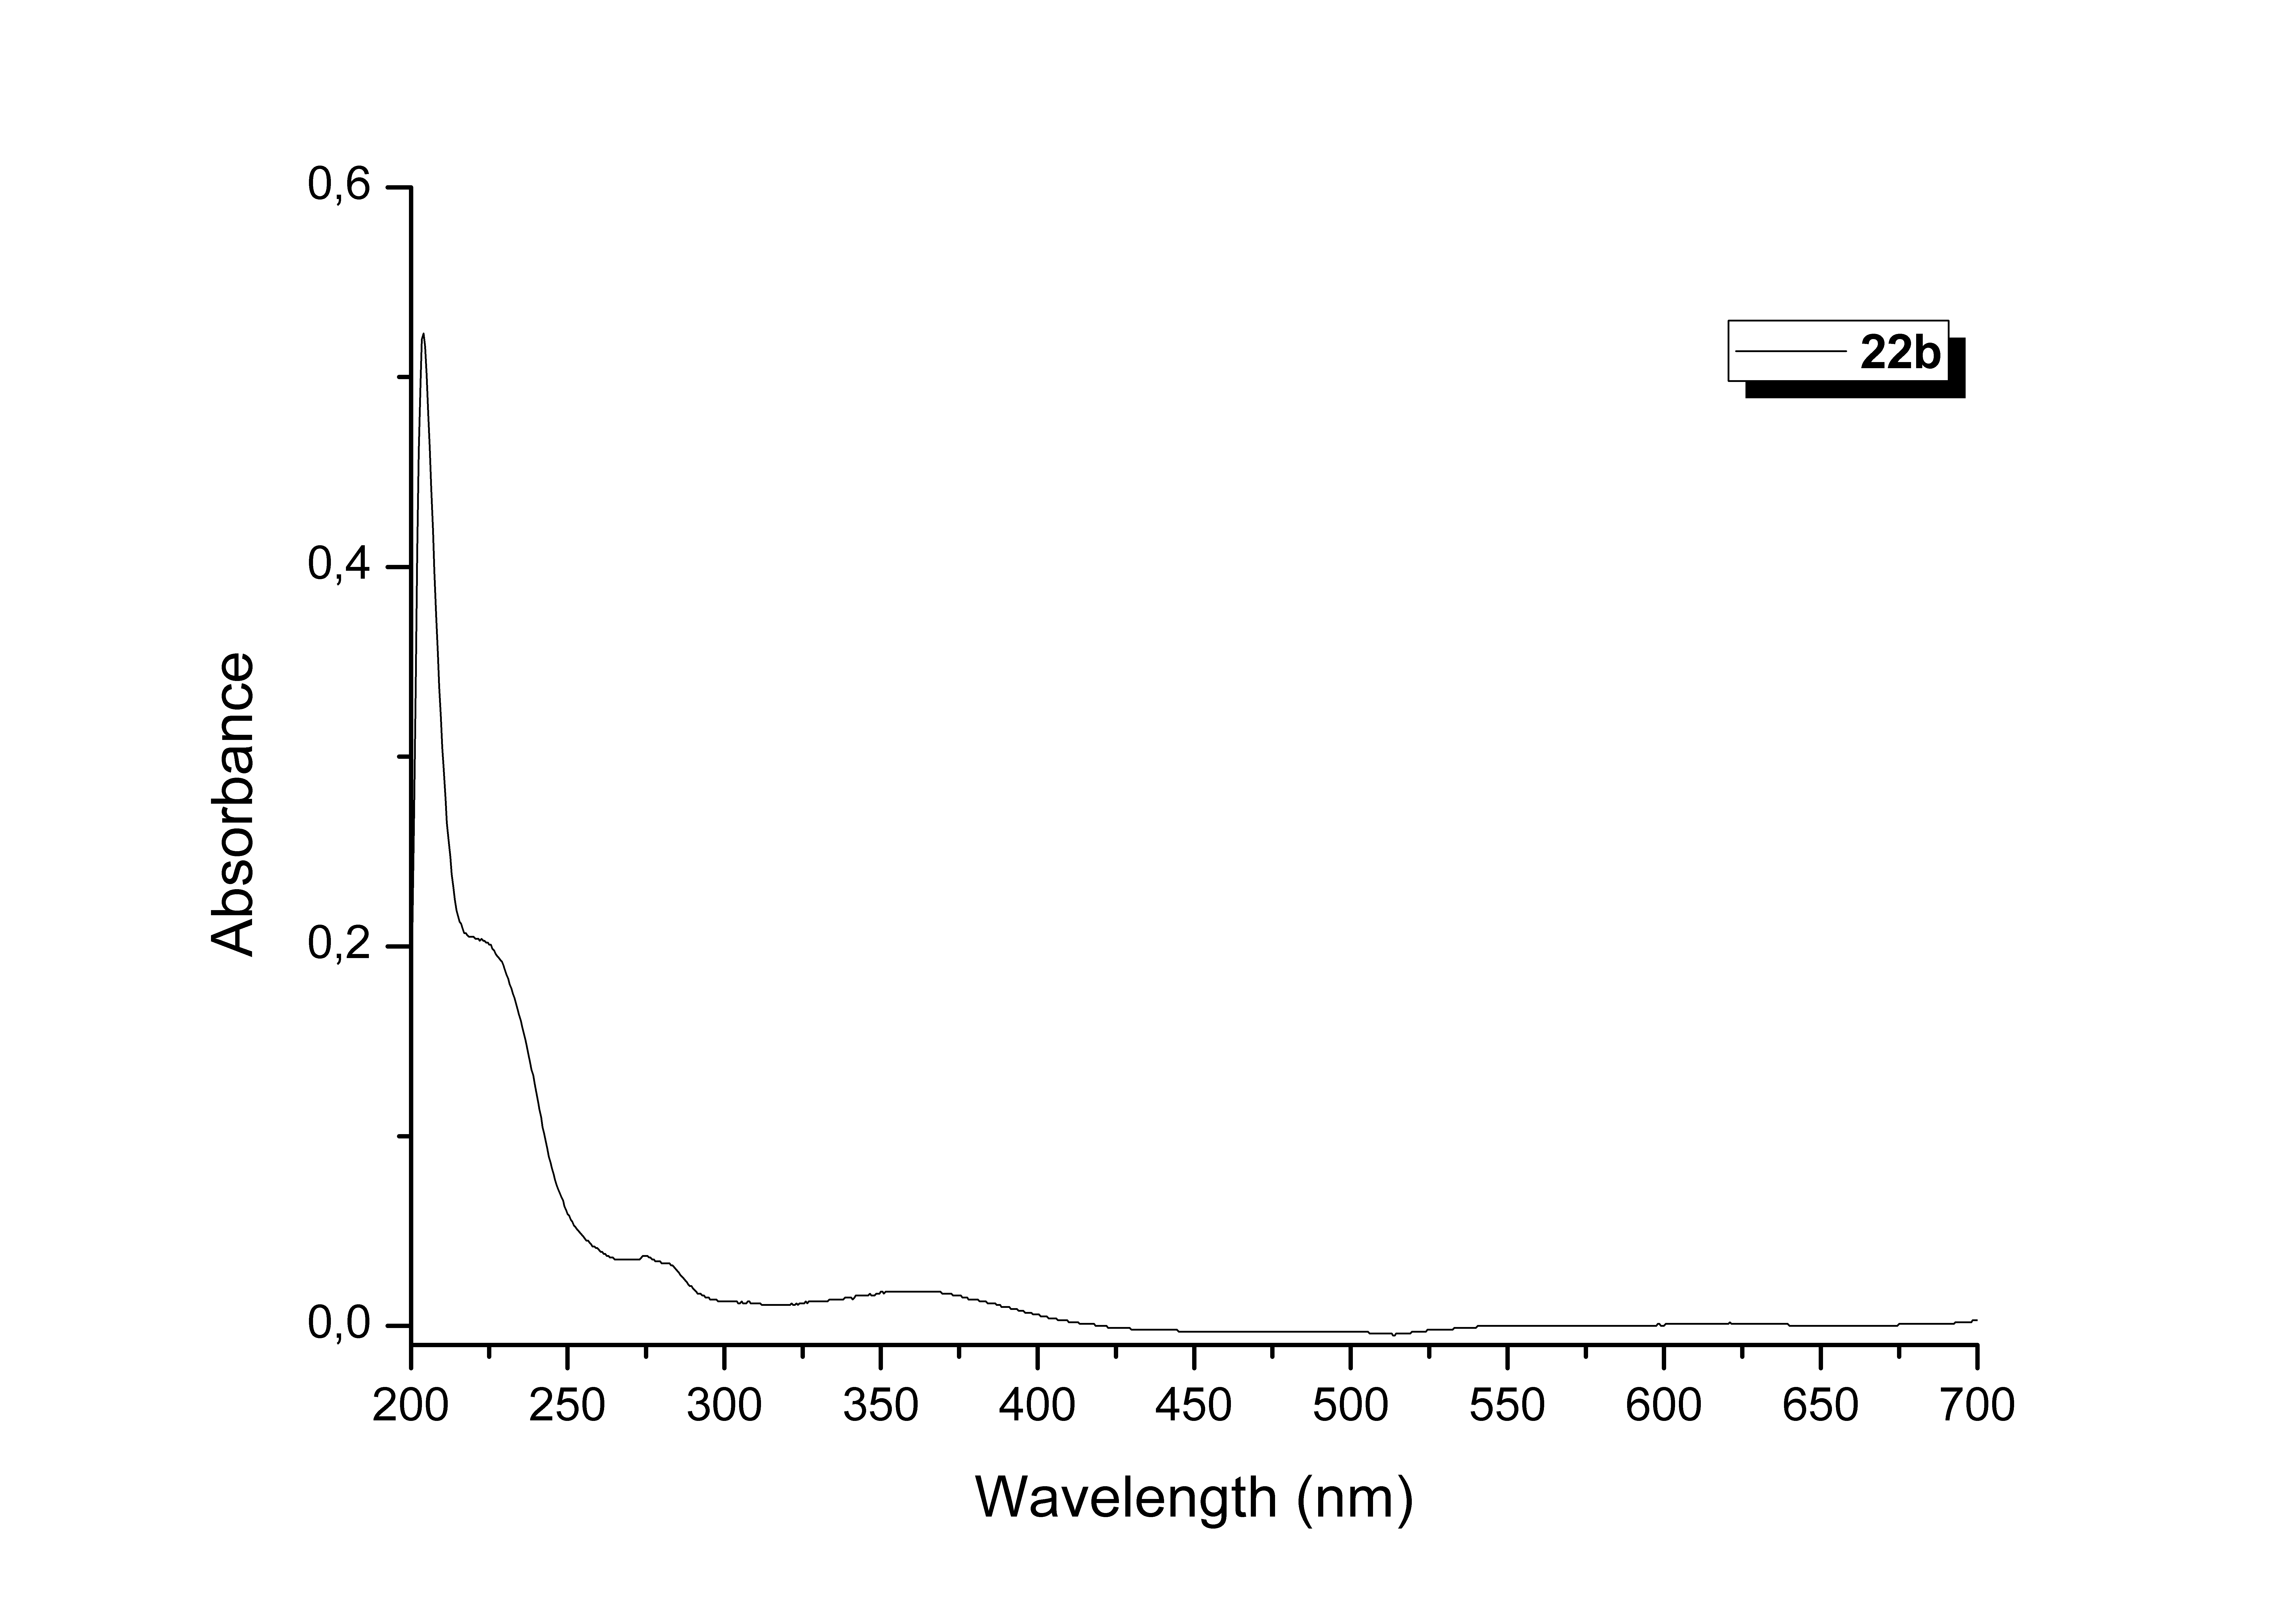
**

**UV-Vis Spectra of 23a**

**
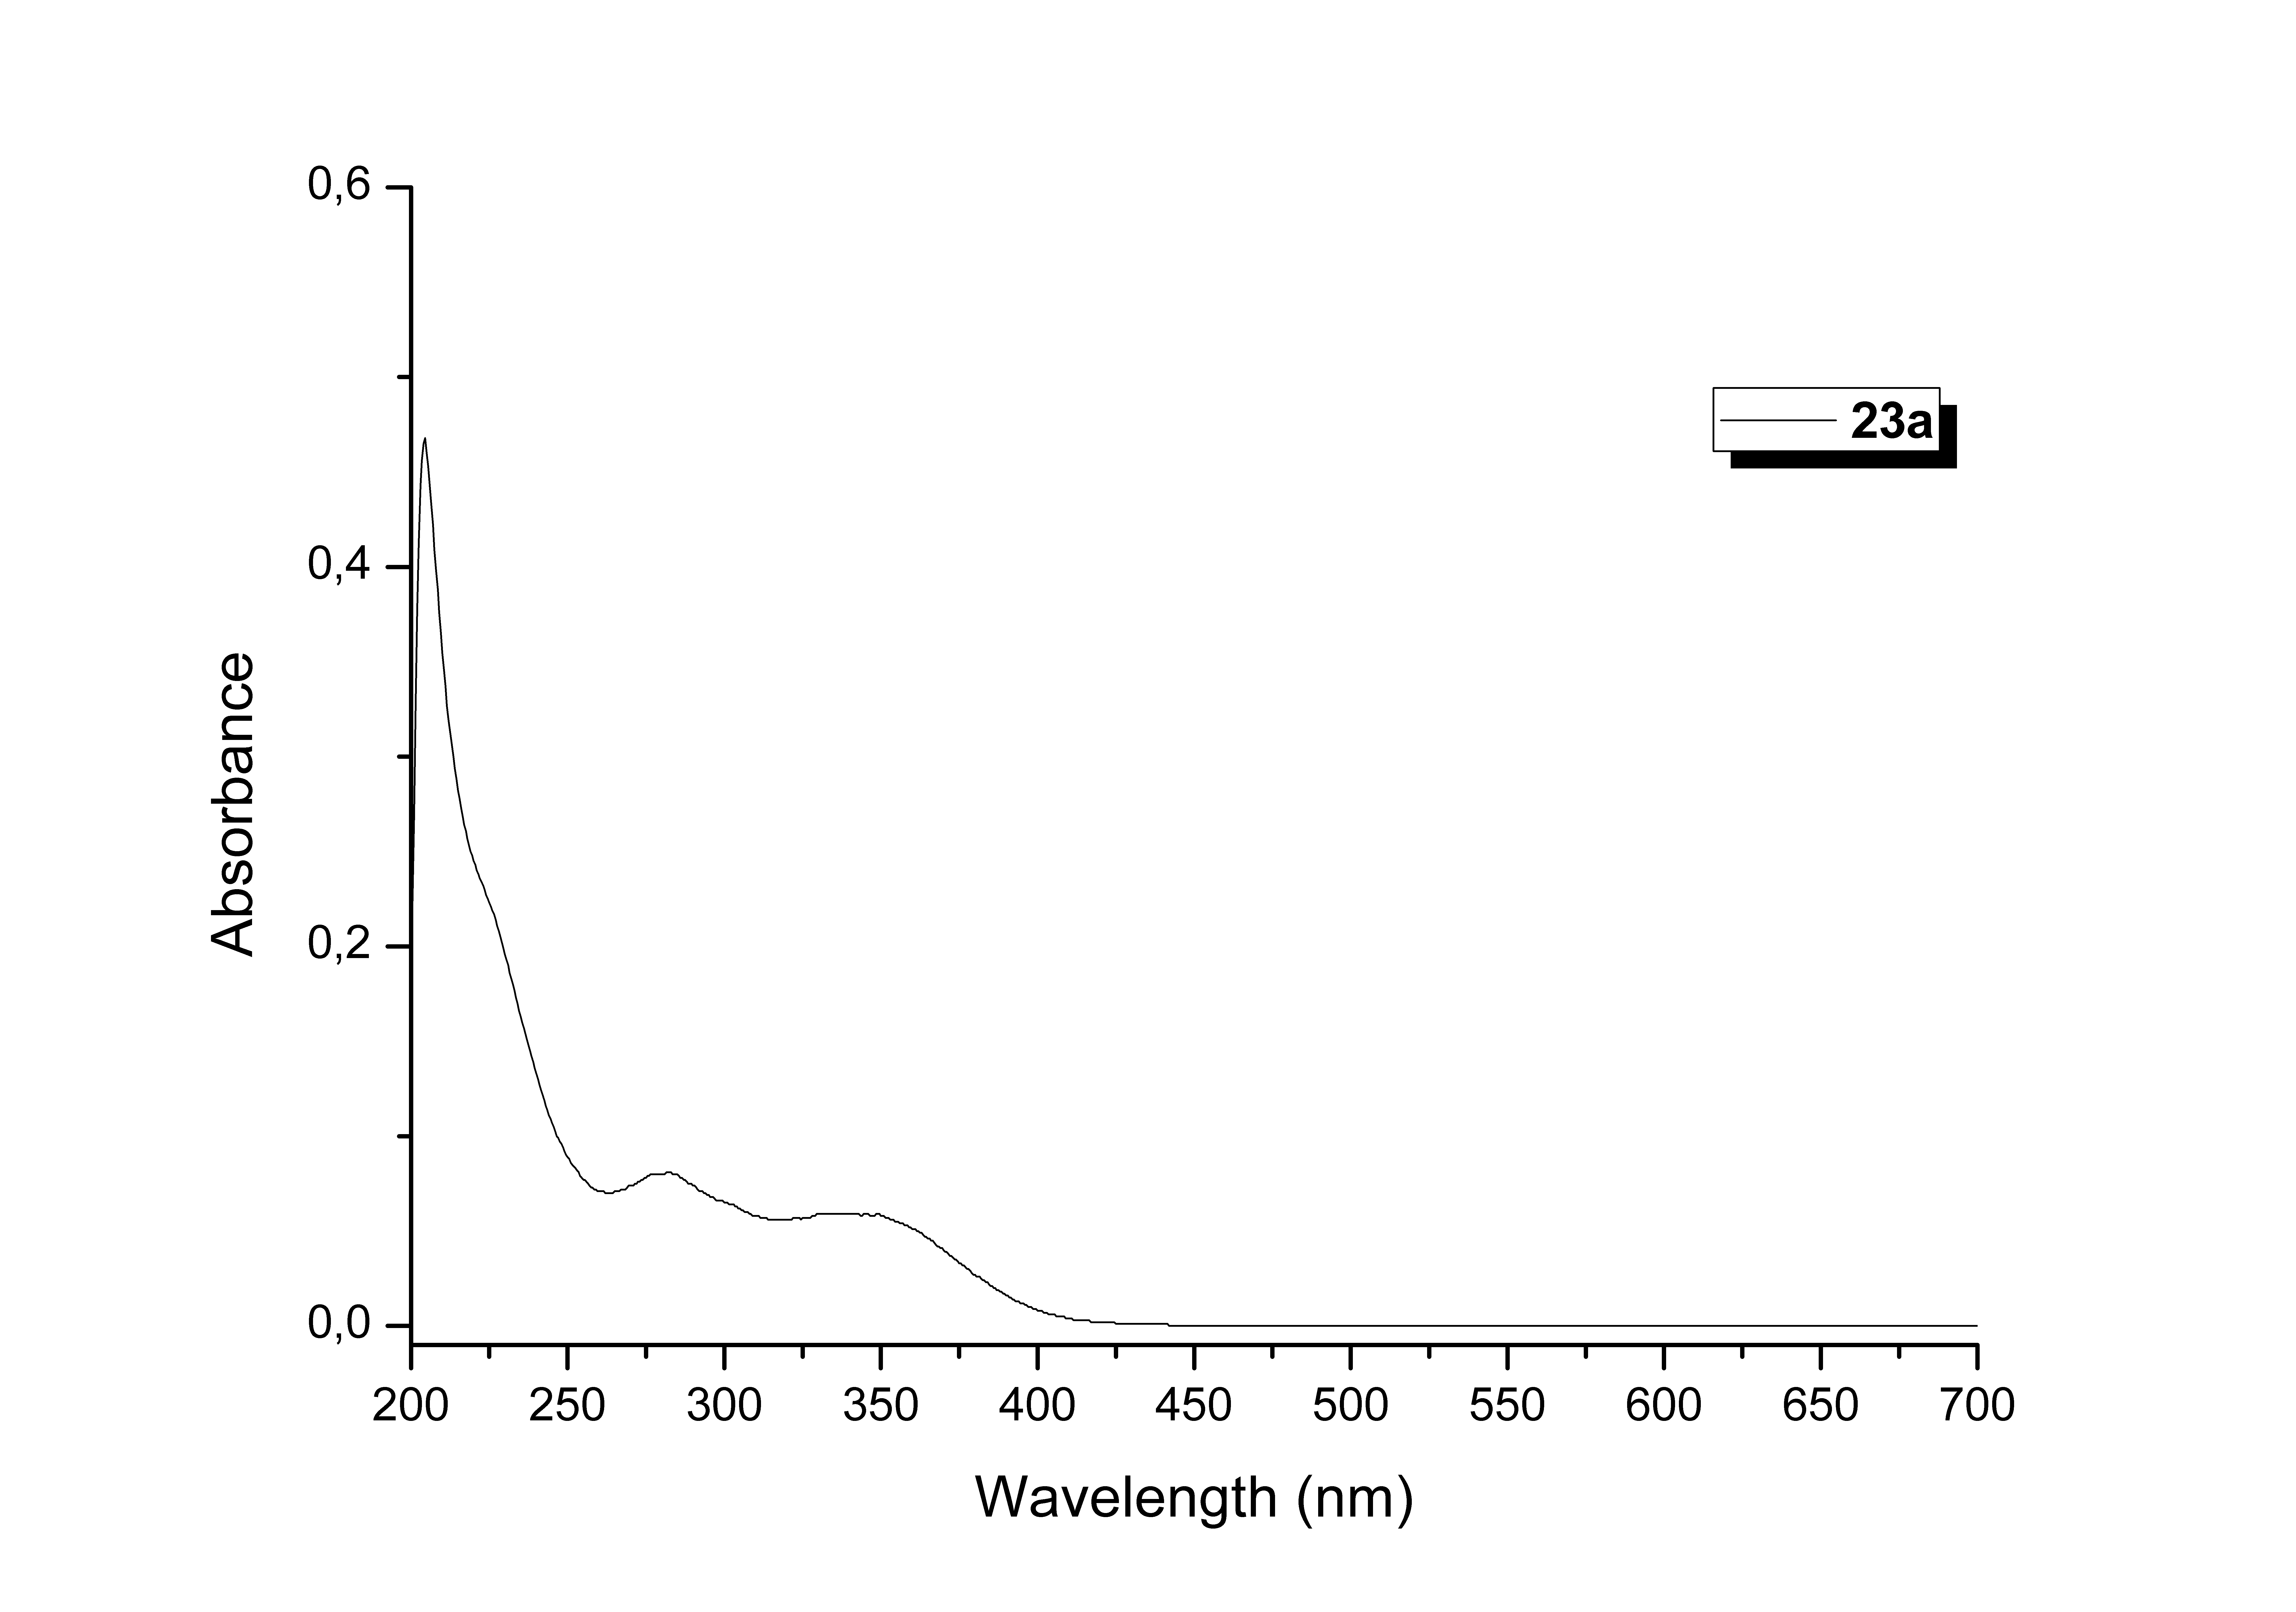
**

**UV-Vis Spectra of 23b**

**
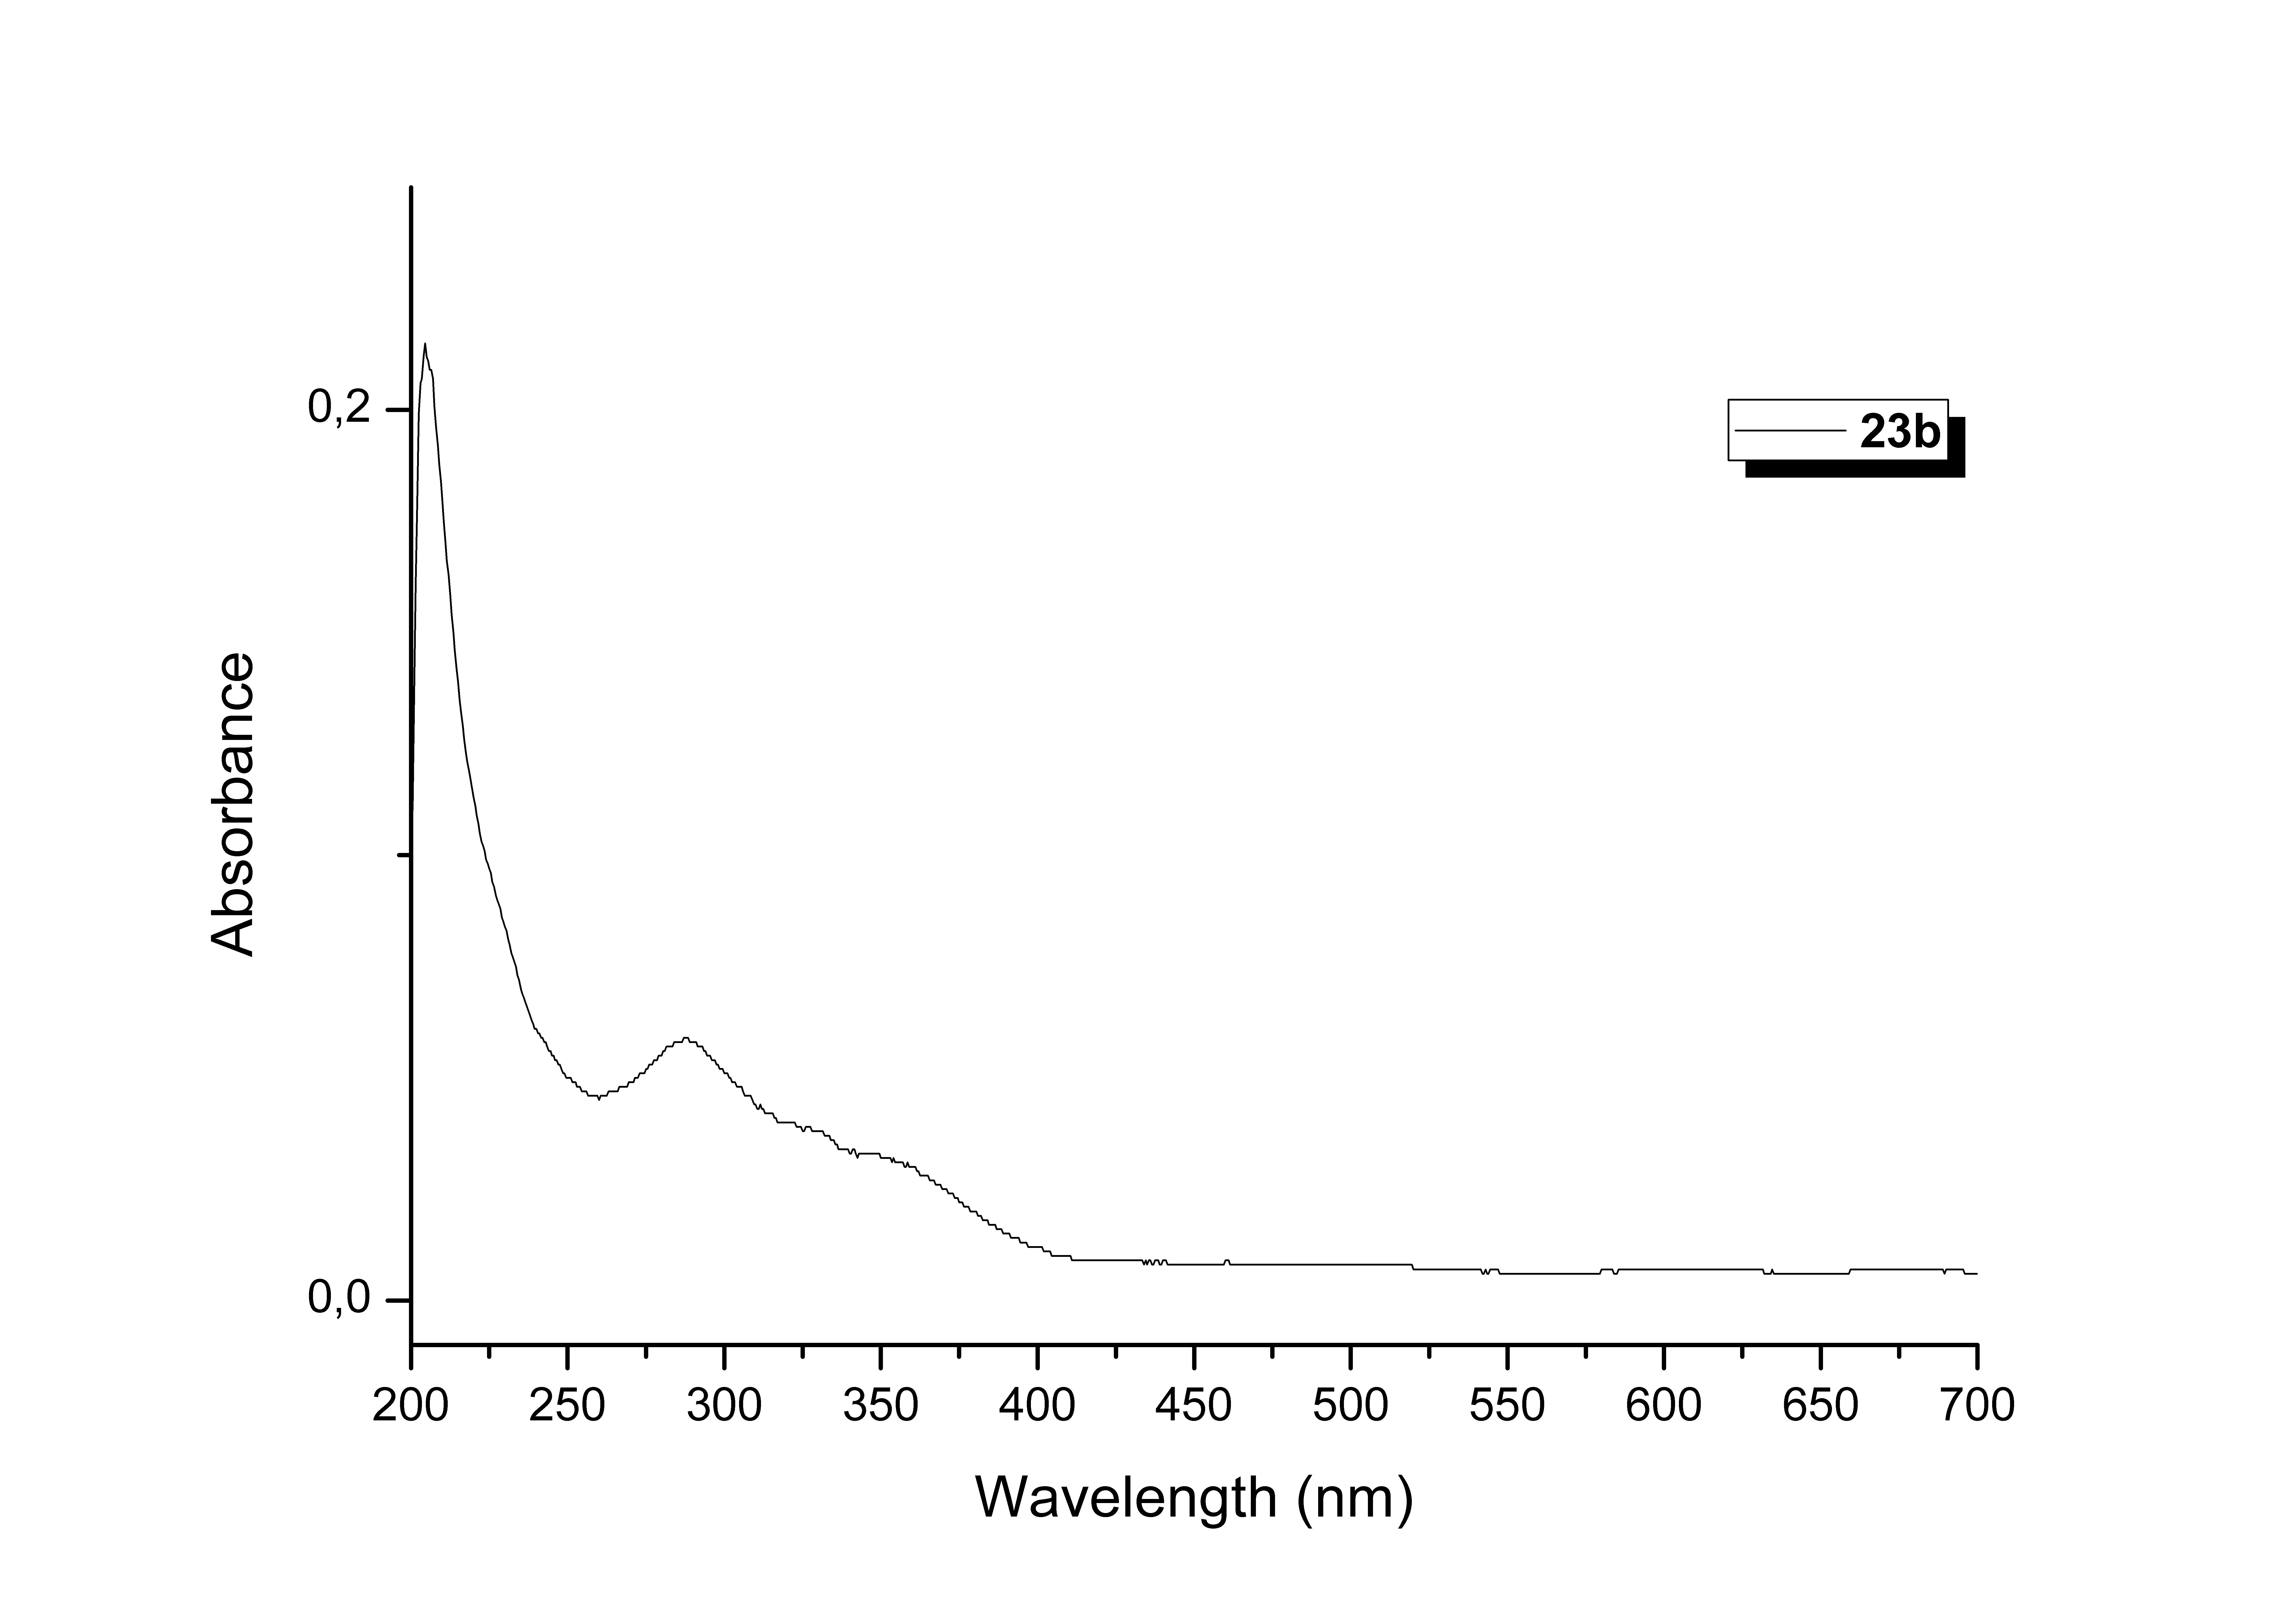
**
